# Supplementary material for: Eco-friendly and facile synthesis of size-controlled spherical silica particles from rice husk
Source: Royal Society of Chemistry journal article supplement (doi:10.1039/d1na00668a), 2021-01-01
Supplement: d1na00668a1.pdf [file d1na00668a1.pdf]

## Supplementary Information

### **Eco-friendly and facile synthesis of size-controlled spherical silica particles from rice husk**

Seong Seop Kim,<sup>‡a</sup> Ji Yeon Park,<sup>b,c</sup> Yang Mo Gu,<sup>b,c</sup> Il-Seop Jang,<sup>d,e</sup> Hayoung Park,<sup>d,e</sup> Kyeong Keun Oh,<sup>f</sup>  
Jin Hyung Lee\*<sup>b</sup> and Jinyoung Chun\*<sup>d</sup>

<sup>a</sup> Max-Planck-Institut für Kohlenforschung, Kaiser-Wilhelm-Platz 1, 45470, Mülheim an der Ruhr, Germany

<sup>b</sup> Convergence R&D Division, Korea Institute of Ceramic Engineering and Technology (KICET), Cheongju, Chungbuk 28160, Republic of Korea

<sup>c</sup> Division of Chemical Engineering & Bio Engineering, Hanyang University, Seoul, 04763, Republic of Korea

<sup>d</sup> Energy and Environmental Division, Korea Institute of Ceramic Engineering and Technology (KICET), Jinju, Gyeongnam 52851, Republic of Korea

<sup>e</sup> Department of Materials Science and Engineering, Korea University, Seoul 02841, Republic of Korea

<sup>f</sup> Department of Chemical Engineering, Dankook University, Yongin, Gyeonggi 16890, Republic of Korea

<sup>‡</sup> Current address: School of Chemical Engineering, Jeonbuk National University, Jeonju 54896, Republic of Korea

**Table S1.** Inorganic compositions of raw rice husk, SS-1, and SS-1A.

|                | <b>Components</b>              | <b>Raw rice husk</b> | <b>SS-1</b> | <b>SS-1A (washing with diluted acetic acid)*</b> |
|----------------|--------------------------------|----------------------|-------------|--------------------------------------------------|
| <b>ICP-OES</b> | SiO <sub>2</sub>               | 94.70                | 97.76       | 99.95                                            |
|                | Na <sub>2</sub> O              | 0.09                 | 2.000       | 0.001                                            |
|                | Al <sub>2</sub> O <sub>3</sub> | 0.08                 | 0.017       | 0.003                                            |
|                | Fe <sub>2</sub> O <sub>3</sub> | 0.06                 | 0.017       | 0.002                                            |
|                | CaO                            | 1.42                 | 0.039       | 0.006                                            |
|                | MgO                            | 0.54                 | 0.057       | 0.002                                            |
|                | K <sub>2</sub> O               | 1.70                 | 0.067       | 0.001                                            |
|                | P <sub>2</sub> O <sub>5</sub>  | 1.14                 | –           | –                                                |
|                | MnO                            | 0.18                 | 0.032       | –                                                |

\*Washing of SS-1A with diluted acetic acid progressed before calcination. The acetic acid solution used in washing process was composed of 5 mL of acetic acid and 100 mL of distilled water, and the washing was carried out by simple stirring at room temperature (25 °C) for 5 min.

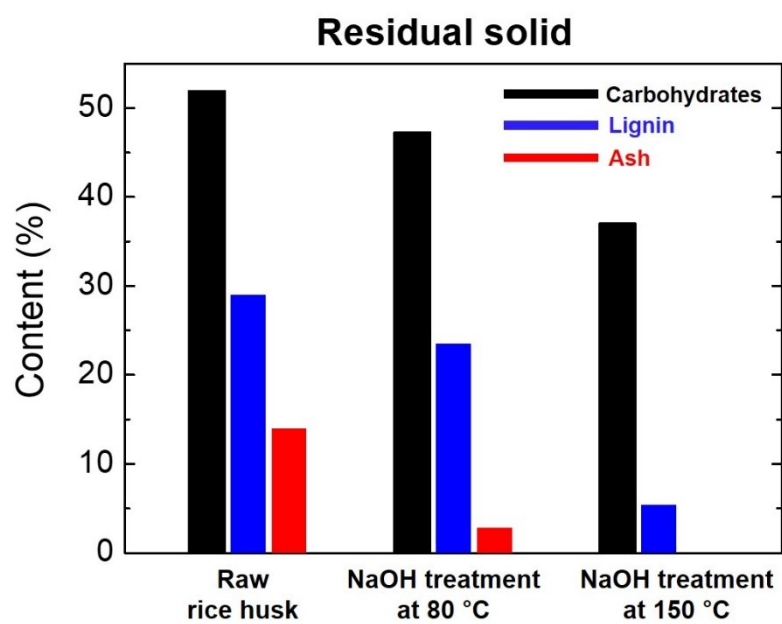

**Fig. S1.** Contents of carbohydrates, lignin, and ash in the raw rice husk and the residual solids after NaOH treatment under mild (80 °C) or harsh conditions (150 °C).

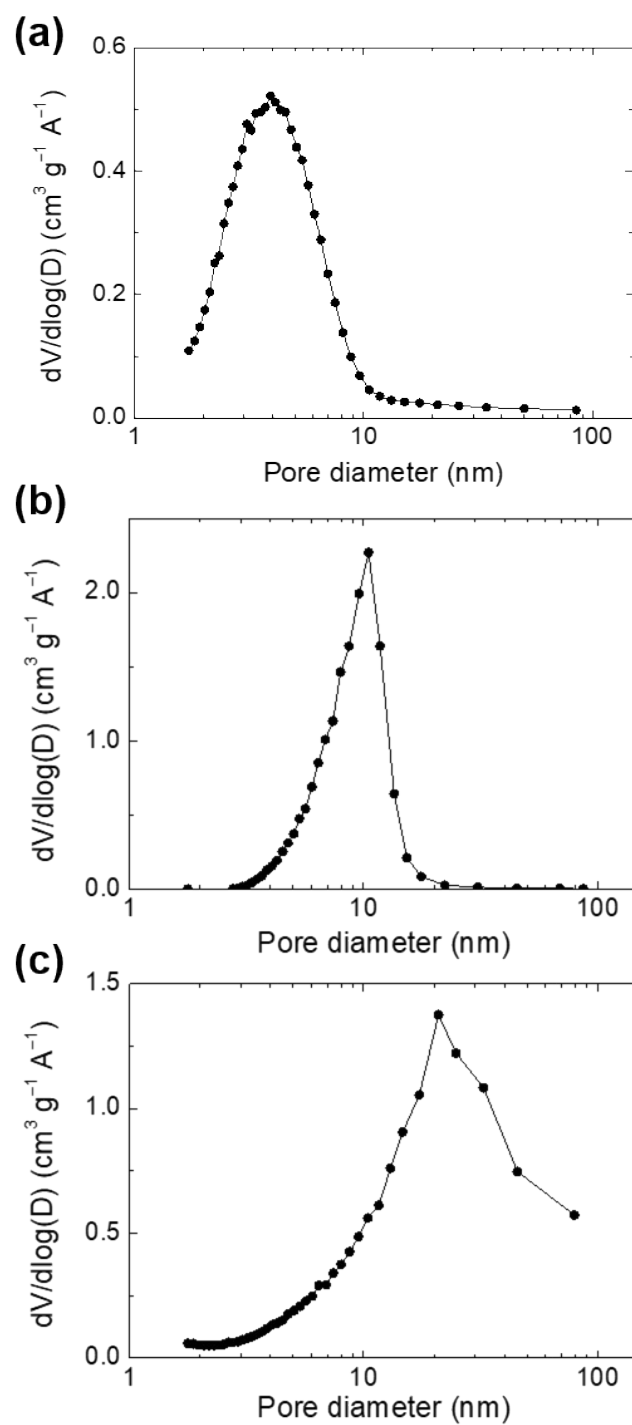

**Fig. S2.** Pore size distributions of (a) SS-1, (b) S-1, and (c) S-2.

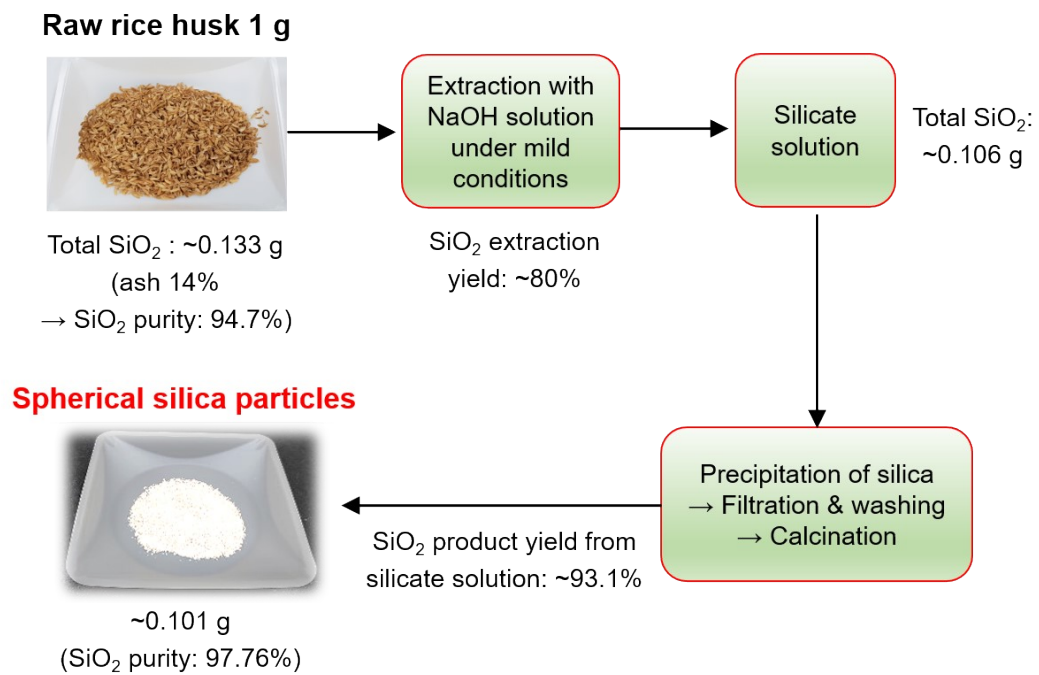

**Fig. S3.** Flow chart showing the amount of spherical silica particles obtained per 1 g of raw rice husk and the percentage silica product yield from silicate solution.

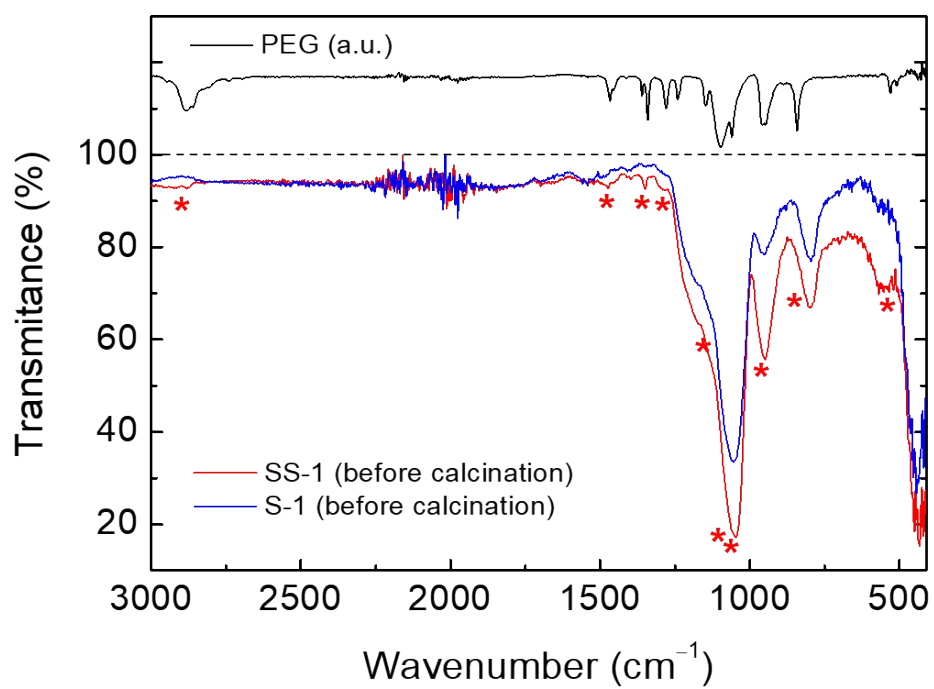

**Fig. S4.** FT-IR spectra of PEG polymer (Mr: 2700–3300, Aldrich), SS-1 (before calcination), and S-1 (before calcination) particles.

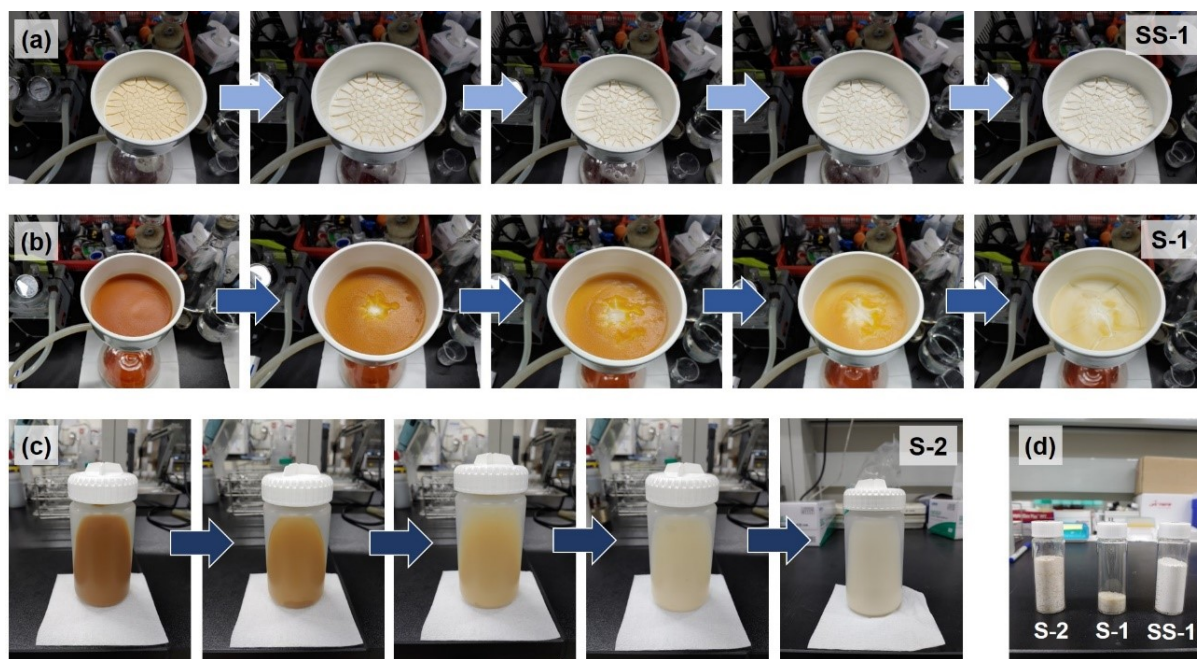

**Fig. S5.** Photographs of the collection and systematic washing of (a) SS-1, (b) S-1, and (c) S-2. 100 mL of distilled water was used per washing cycle, and washing was performed four times. (d) Photograph of dried samples after washing.

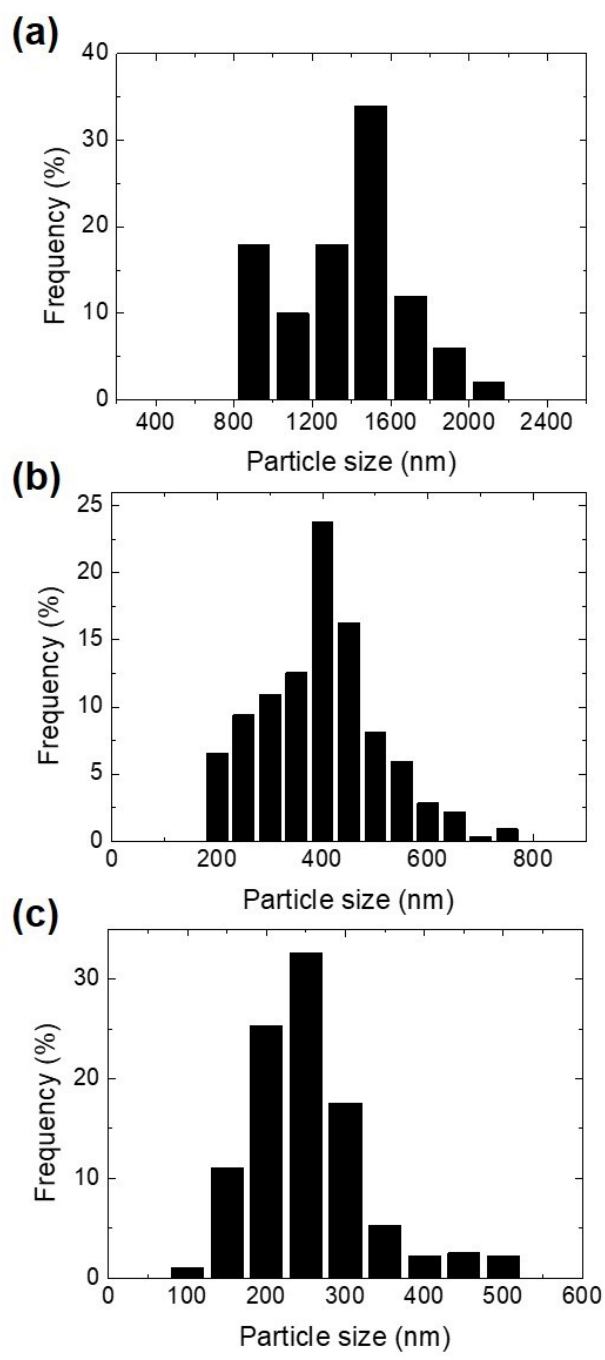

Fig. S6. Particle size distributions of (a) SS-2, (b) SS-3, and (c) SS-4.
